# Supplementary material for: TRPM7 is a crucial regulator of pancreatic endocrine development and high-fat-diet-induced β-cell proliferation
Source: Oxford University Press journal article supplement (doi:10.1242/dev.194928), 2021-08-04
Supplement: dev194928supp.pdf [file dev194928supp.pdf]

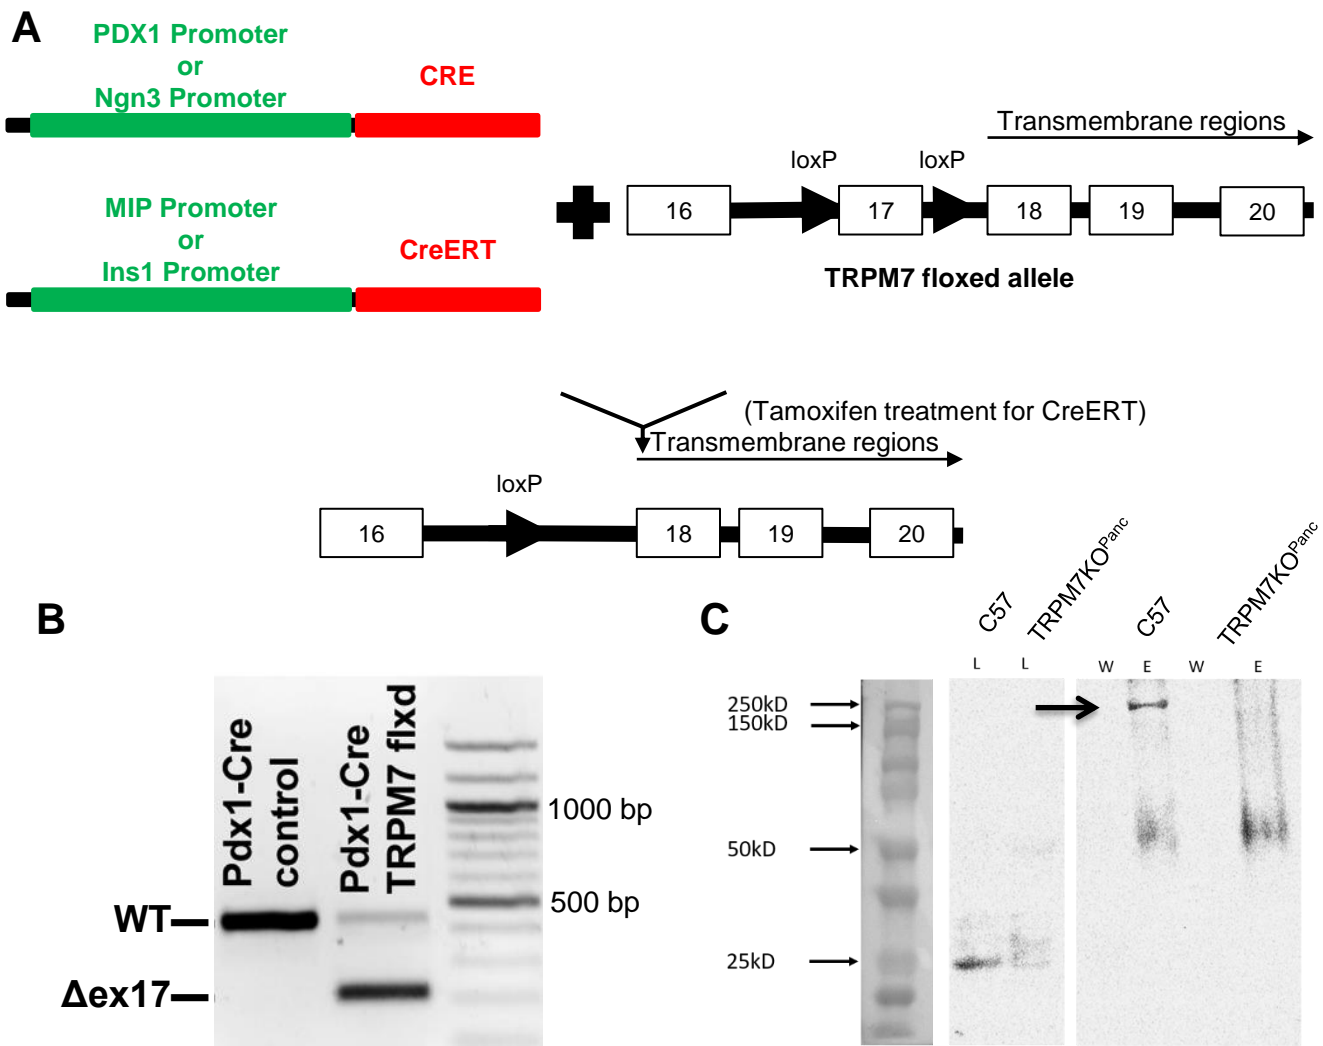

**Fig. S1. Mouse model design and confirmation of successful PDX knockout.**(A) Schematic of the transgenic design of mouse models with chronic (TRPM7KO<sup>Panc</sup> or TRPM7KO<sup>Endo</sup>) pancreatic specific and conditional  $\beta$ -cell specific tamoxifen-inducible (TRPM7KO<sup>MIP $\beta$</sup>  or TRPM7KO<sup>Ins $\beta$</sup> ) TRPM7 ablation. (B) Islet genomic DNA from Pdx1-Cre or TRPM7KO<sup>Panc</sup> mice analyzed by PCR for TRPM7 exon 17 deletion. (C) Immunoprecipitation showing knockdown of TRPM7 protein in whole cell lysate from C57/B6 (C57) or TRPM7KO<sup>Panc</sup> mouse pancreas from 12-week animals. Black arrow indicates band associated with full length TRPM7 protein. L = load, W = wash, E = elution.

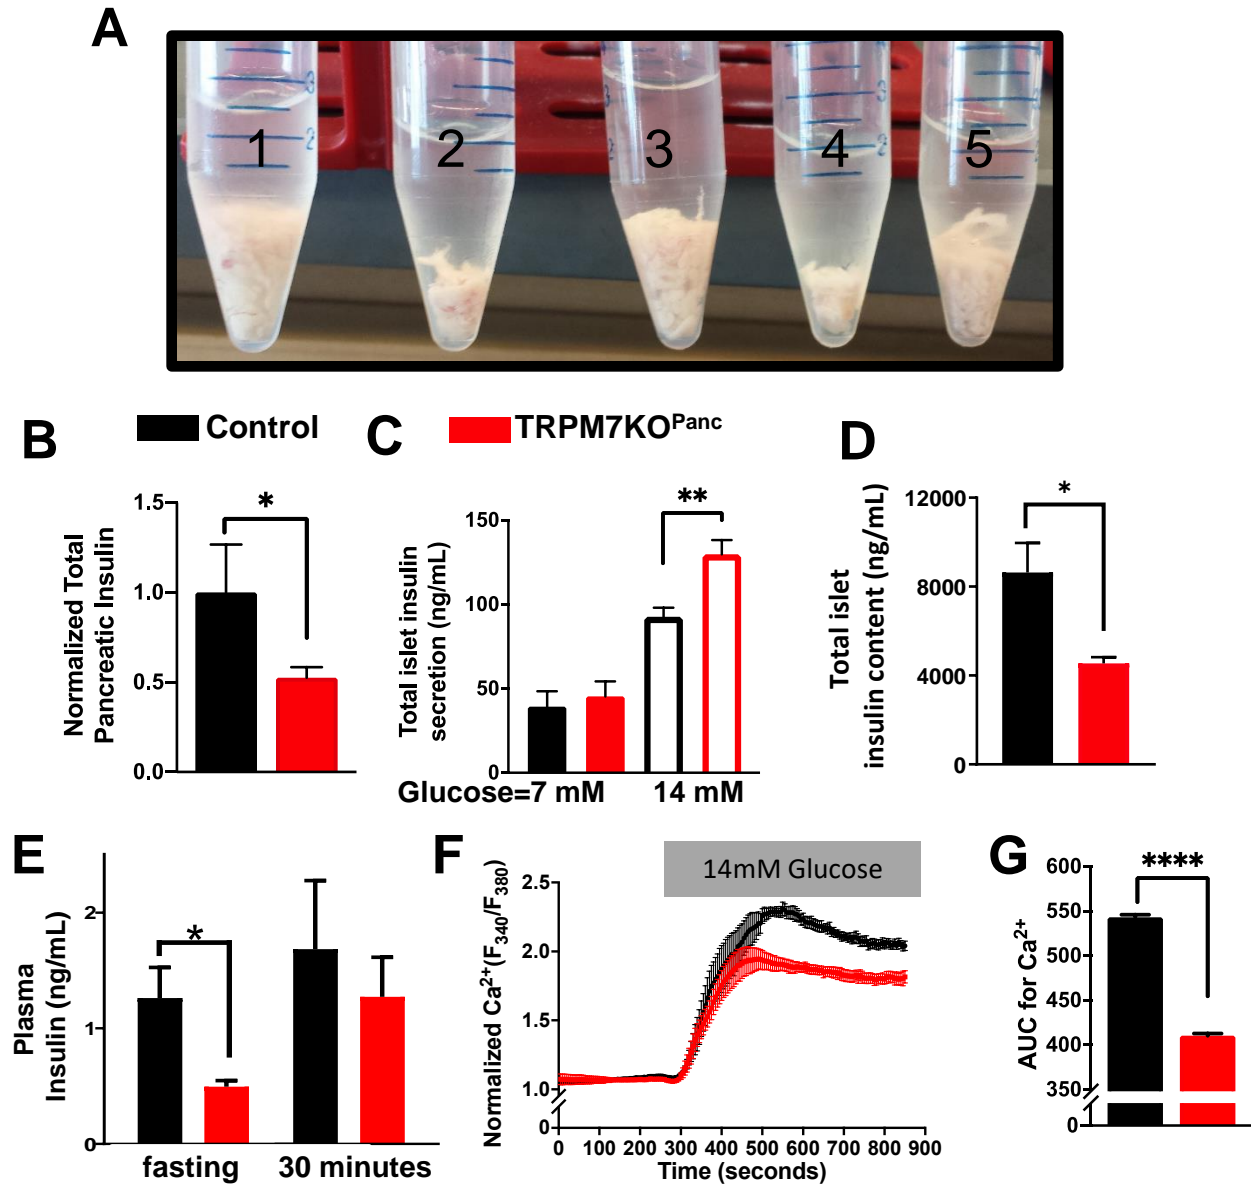

**Fig. S2. Adult TRPM7KO<sup>Panc</sup> pancreata showed diminished size and insulin content.** (A) Pancreata harvested from TRPM7KO<sup>Panc</sup> mice (2, 4) following distention appeared significantly smaller than those from control mice (1, 3, 5). (B) Total pancreatic insulin was significantly lower in TRPM7KO<sup>Panc</sup> mice compared to controls ( $47.39 \pm 15.75\%$  reduction,  $n = 3$   $P < 0.05$ ). (C) GSIS was significantly increased in TRPM7KO<sup>Panc</sup> mice compared to control ( $39.95 \pm 10.69\%$ ,  $n = 5$ ). (D) Total islet insulin content was reduced in TRPM7KO<sup>Panc</sup> islets compared to controls ( $n = 3$  mice each and 20 equivalent sized islets/mouse) (E) Fasting plasma insulin was reduced in TRPM7KO<sup>Panc</sup> mice, but 30 minutes post GTT glucose bolus plasma insulin was equivalent between TRPM7KO<sup>Panc</sup> mice and controls. Relative glucose-stimulated (14 mM) cytosolic Ca<sup>2+</sup> responses (F) and total AUC (G) in control (black) and TRPM7KO<sup>Panc</sup> (red) islets. Where applicable analysis are mean  $\pm$  SEM. \* $P < 0.05$ , \*\* $P < 0.01$ , \*\*\*\* $P < 0.0001$ .

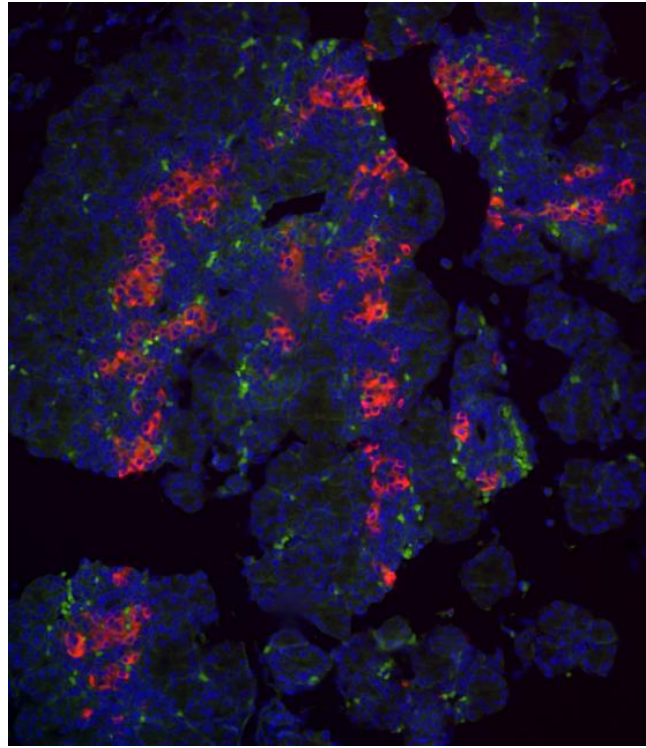

**Fig. S3. Cre expression in E16.5 TRPM7KO<sup>Endo</sup> mice.** Representative immunofluorescent image of pancreatic section from TRPM7KO<sup>Endo</sup> mouse (Cre -green, insulin - red) from a E16.5 pancreatic section.

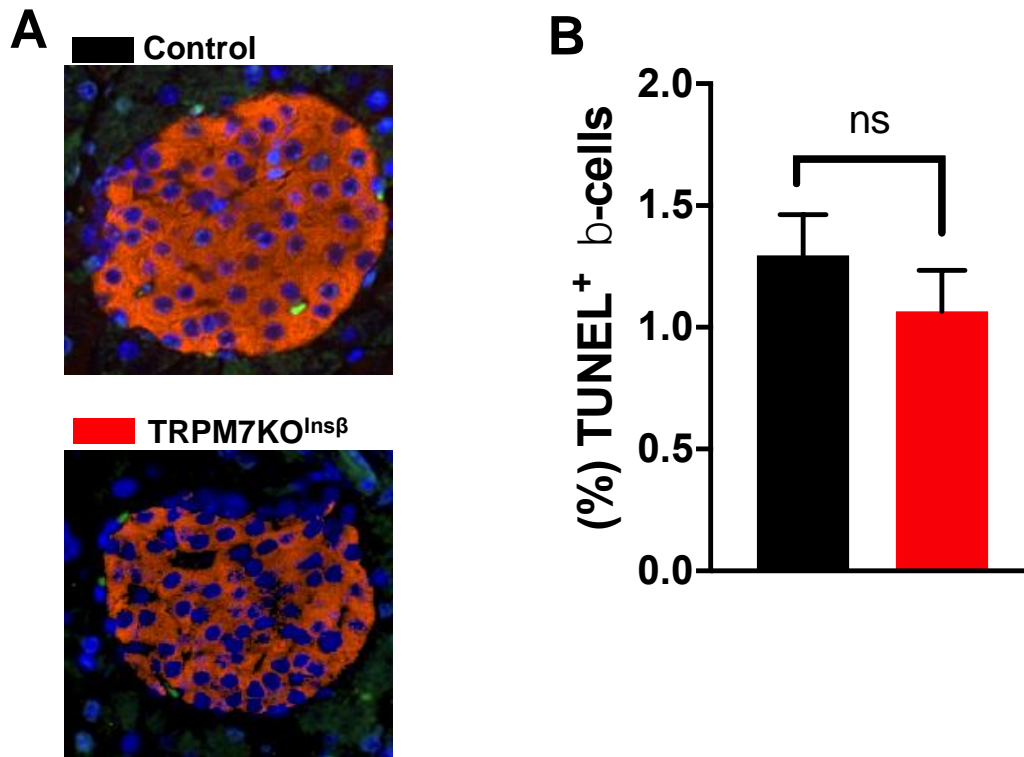

**Fig. S4.  $\beta$ -cell specific ablation of TRPM7 (TRPM7KO<sup>Ins $\beta$</sup> ) did not affect apoptosis (HFD).** Representative images of pancreas sections immunostained for insulin (red), TUNEL (green) and DAPI (blue) from control and TRPM7KO<sup>Ins $\beta$</sup>  mice. (B) Percentage of TUNEL<sup>+</sup>  $\beta$ -cells ( $n=3$ ,  $P=0.385$ ). Where applicable analysis are mean  $\pm$  SEM.

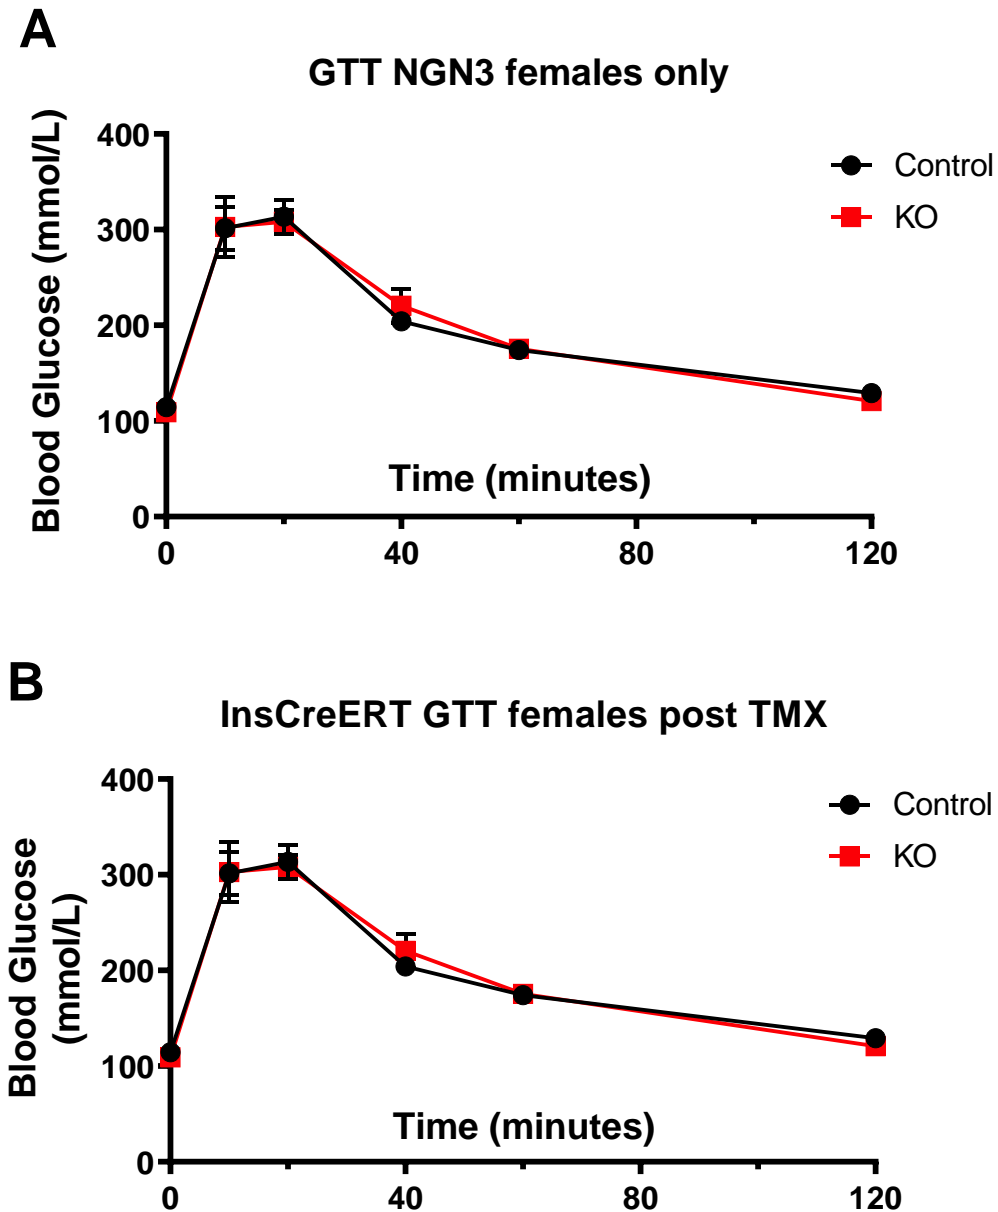

**Fig. S5. Female  $TRPM7KO^{Endo}$  and  $TRPM7KO^{INS\beta}$  show normal glucose tolerance.** Glucose tolerance of 12-week-old female  $TRPM7KO^{Endo}$  (A) and  $TRPM7KO^{INS\beta}$  (B) mice compared to controls.  $TRPM7KO^{INS\beta}$  mice and their controls were treated with tamoxifen and allowed 2 weeks recovery post tamoxifen before GTT.

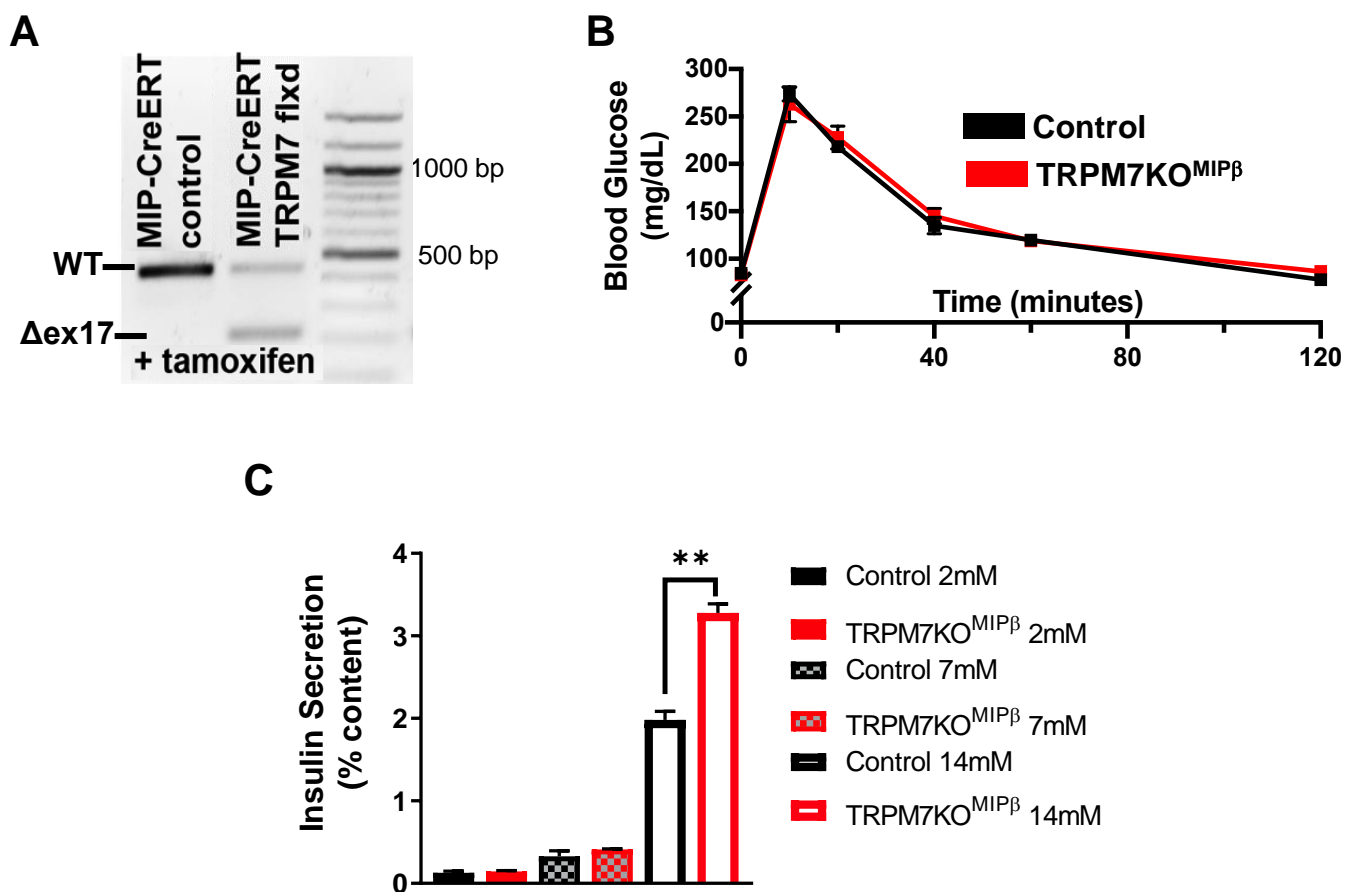

**Fig. S6.  $\beta$ -cell knockdown of TRPM7 (TRPM7KO<sup>MIP $\beta$</sup> ) enhances GSIS but not GTT.** (A) Islet genomic DNA from MIP-CreERT or TRPM7KO<sup>MIP $\beta$</sup>  mice analyzed by PCR for TRPM7 exon 17 deletion post-tamoxifen treatment. (B) Glucose tolerance from 12-week-old MIP-CreERT and TRPM7KO<sup>MIP $\beta$</sup>  males (n=5 each). (C) Insulin secretion from TRPM7KO<sup>MIP $\beta$</sup>  islets compared to controls normalized to content. Where applicable analysis are mean  $\pm$  SEM. \*\* $P$ <0.01.

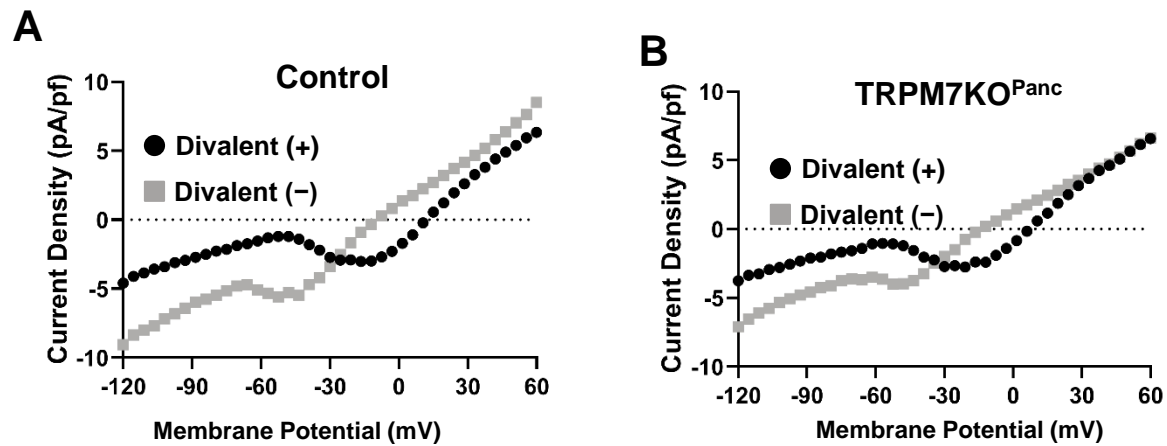

**Fig. S7. TRPM7 alters  $\beta$ -cell whole cell currents.** Representative TRPM7 currents recorded from control (A) and TRPM7KO<sup>Panc</sup> (B)  $\beta$ -cells in the presence (black circles) or absence (grey squares) of divalent cations. Data analysis for these recordings can be found in Figure 4A.

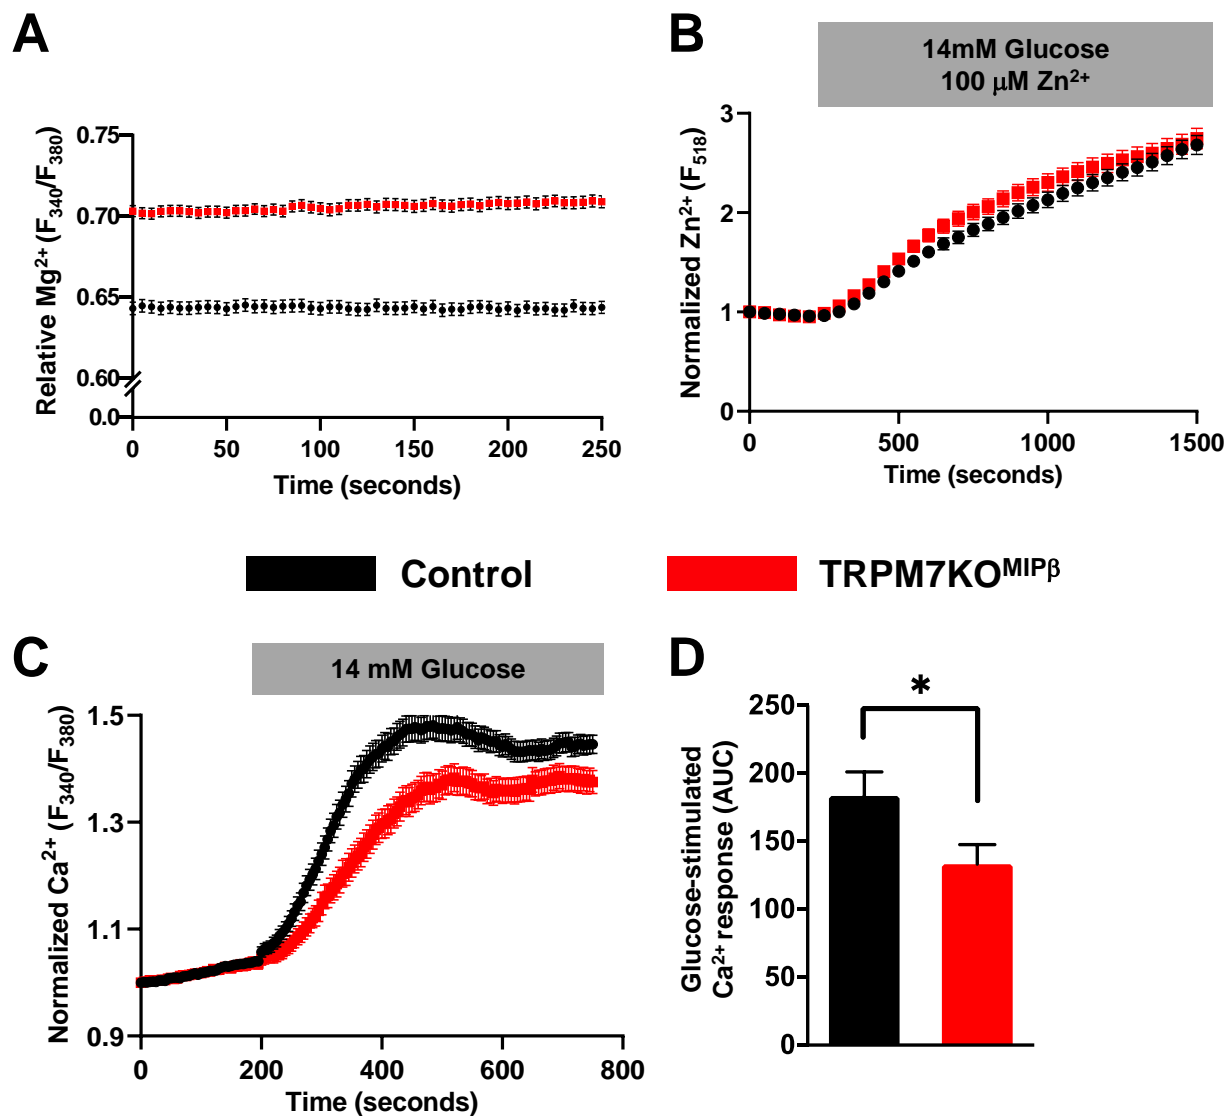

**Fig. S8.  $\beta$ -cell specific ablation of TRPM7 (TRPM7KO<sup>MIP $\beta$</sup> ) decreases  $Ca^{2+}$  influx and  $Mg^{2+}$  efflux.** (A) Relative intracellular  $Mg^{2+}$  levels in  $\beta$ -cells from control (black) and TRPM7KO<sup>MIP $\beta$</sup>  (red) in the absence of extracellular  $Mg^{2+}$ . (B) Relative  $\beta$ -cell intracellular  $Zn^{2+}$  levels from TRPM7KO<sup>MIP $\beta$</sup>  and control mice after in response to 100  $\mu M$   $Zn^{2+}$  and 14 mM glucose (grey bar). (C) Glucose-stimulated (14 mM) islet  $Ca^{2+}$  responses and corresponding total AUC (D,  $24.21 \pm 10.91\%$  reduction,  $P < 0.05$ ) from control and TRPM7KO<sup>MIP $\beta$</sup>  mice. Where applicable, data are mean  $\pm$  SEM and significance is calculated with a two-tailed Student's *t*-test. \* $P < 0.05$ .



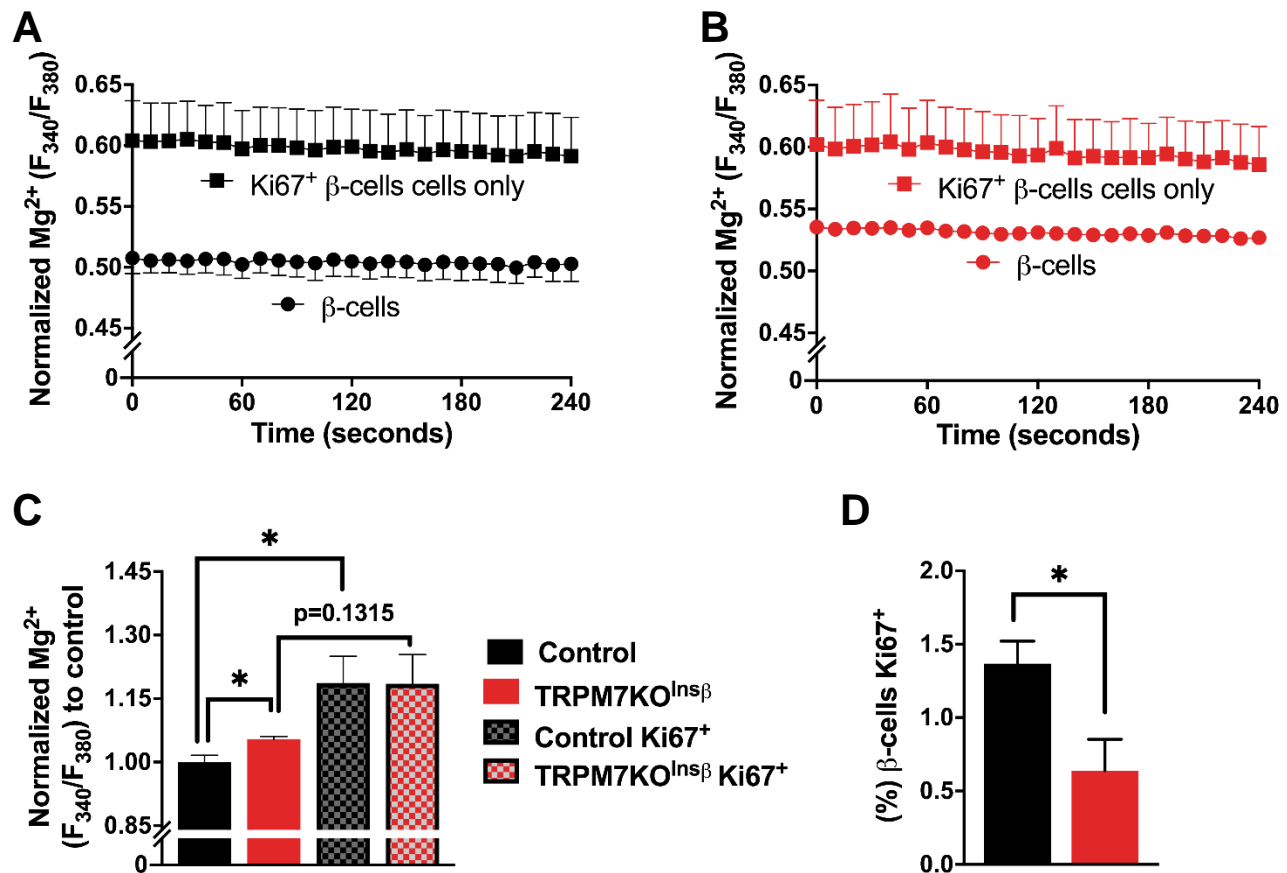

**Fig. S9. TRPM7 lowers  $Mg^{2+}$  levels within nonproliferating single  $\beta$ -cells as well as  $\beta$ -cells with islet cell clusters.**  $\beta$ -cell  $Mg^{2+}$  levels recorded from non-proliferating(●) and proliferating(■) cells; the  $\beta$ -cells were from control (A) and TRPM7KO<sup>Insβ</sup> (B) mice 2 weeks post exposure to HFD. Note: this data combines  $Mg^{2+}$  levels from both single  $\beta$ -cells and from those within islet cell clusters. (C) Fold change in  $Mg^{2+}$  levels for the indicated  $\beta$ -cell cohorts normalized to non-proliferating controls ( $\beta$ -cells from islets of animals fed a HFD for 2-weeks). (D) Percent of Ki67-positive  $\beta$ -cells from cohorts shown in A and B. Data are mean $\pm$ SEM, \* $P$ <0.05.
